# Supplementary material
Source: publisher site journal article supplement (http://www.dovepress.com/get_supplementary_file.php?f=293046.docx)
Supplement: Supplementary file 1 [file get_supplementary_file.php]

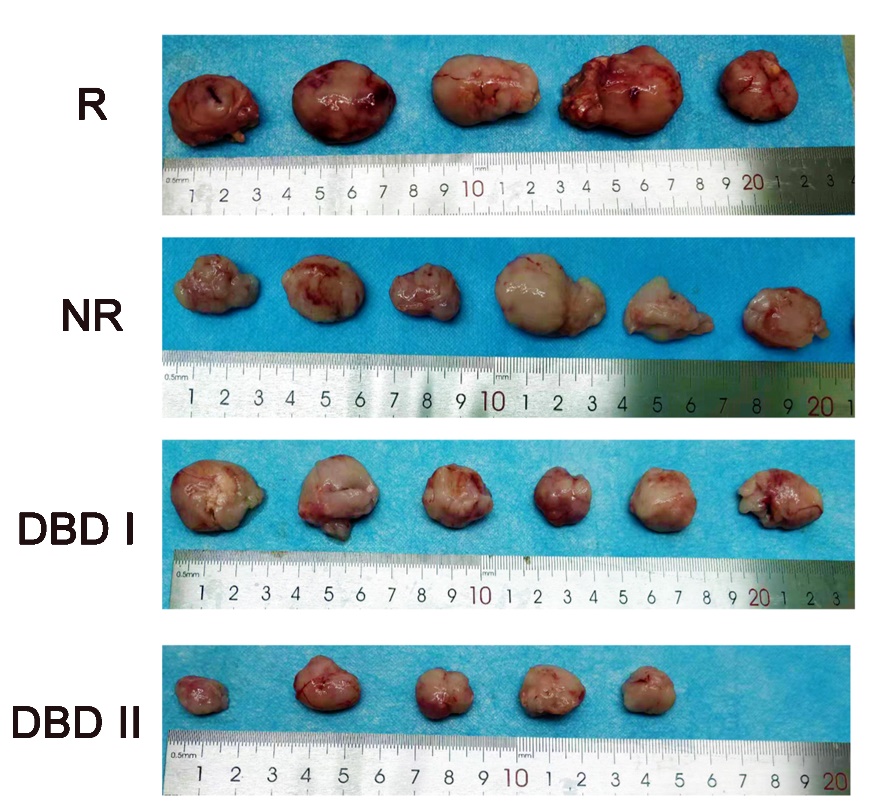


**Supplementary Figure S1** Tumor samples in groups R, NR, DBD I and DBD II.

Supplementary Table S1 The 61 potential targets of DBD against MCC

| Number | Gene | | Number | Gene |
| --- | --- | --- | --- | --- |
| 1 | | MMP2 | 31 | AKR1B10 |
| 2 | | NOS2 | 32 | RXRA |
| 3 | | MET | 33 | PON1 |
| 4 | | SHBG | 34 | CASP8 |
| 5 | | BCL2 | 35 | PPARG |
| 6 | | CYP1A1 | 36 | ABCB1 |
| 7 | | NQO2 | 37 | LCK |
| 8 | | AHR | 38 | NR1H2 |
| 9 | | NFE2L2 | 39 | STAT3 |
| 10 | | CYP19A1 | 40 | ADRB2 |
| 11 | | CA9 | 41 | ACHE |
| 12 | | PTGS2 | 42 | CASP3 |
| 13 | | ESR1 | 43 | PARP1 |
| 14 | | MMP1 | 44 | VDR |
| 15 | | HMGCR | 45 | PTPN1 |
| 16 | | PPARD | 46 | PPARA |
| 17 | | NR3C2 | 47 | TTR |
| 18 | | PTGER2 | 48 | CYP1A2 |
| 19 | | EGFR | 49 | TOP2A |
| 20 | | G6PD | 50 | CA2 |
| 21 | | NCOA1 | 51 | RELA |
| 22 | | PGR | 52 | OPRM1 |
| 23 | | CYP17A1 | 53 | TLR9 |
| 24 | | CASP9 | 54 | PTGS1 |
| 25 | | NCOA2 | 55 | F3 |
| 26 | | ESR2 | 56 | JUN |
| 27 | | CYP1B1 | 57 | AR |
| 28 | | PLAU | 58 | BAX |
| 29 | | SLC6A4 | 59 | PRKCA |
| 30 | | ALOX5 | 60 | APP |
|  | |  | 61 | MMP9 |
